# Supplementary material
Source: publisher figshare collection journal article supplement (https://frontiersin.figshare.com/ndownloader/files/33648635)
Supplement: Supplementary file [file 33648635]

## Supplementary Material

*Table S1: Proportion of correctly and fluently named items in ON and AN across testing points, as reported in Table 2 of the main document with more information for between test comparison: Scores are reported in proportions of correctly named items during ON and AN. Scores that indicate a clinical impairment compared to healthy normative data (Singlims, Crawford et al., 2010) are marked by a hashtag (#). Healthy controls performed at  $0.884 \pm 0.046$  (range 0.8-0.933) for ON (Sollmann, Fuss-Ruppenthal, et al., 2018) and at  $0.852 \pm 0.059$  (range 0.667-0.933) for AN (Ohlerth et al., 2021). Significant difference between tasks (Revised Standardized Difference Test (RSDT), Crawford et al., 2010) is marked by an asterisk (\*). Case 1-3 were not operated awake and, hence, the tests were not administered (N/A) 1 Day preoperatively.*

| Case | Test | Baseline       | Impairment compared to healthy controls at baseline | Difference between ON and AN at baseline | 1 Day Pre-operative | Impairment compared to healthy controls pre-operative | Difference between ON and AN preop | 3 Days Post-operative | Impairment compared to healthy controls postop | Difference between ON and AN post-operative | Sig. Difference between Baseline and Preoperative | Sig. Difference between Baseline and Postoperative | Difference in Decline between ON and AN (Unpaired MWU) |
|------|------|----------------|-----------------------------------------------------|------------------------------------------|---------------------|-------------------------------------------------------|------------------------------------|-----------------------|------------------------------------------------|---------------------------------------------|---------------------------------------------------|----------------------------------------------------|--------------------------------------------------------|
| 1    | ON   | <b>0.813*</b>  | 0.149                                               | <b>0.018*</b>                            | N/A                 | N/A                                                   | N/A                                | <b>0.838*</b>         | 0.341                                          | <b>0.016*</b>                               | N/A                                               | 0.790                                              | 0.967                                                  |
|      | AN   | <b>0.573*#</b> | <b>&lt;0.001*</b>                                   |                                          | N/A                 | N/A                                                   |                                    | <b>0.600*#</b>        | <b>0.001*</b>                                  |                                             | N/A                                               | 0.831                                              |                                                        |
| 2    | ON   | 0.850          | 0.485                                               | 0.401                                    | N/A                 | N/A                                                   | N/A                                | 0.825                 | 0.230                                          | 0.262                                       | N/A                                               | 0.803                                              | 0.702                                                  |
|      | AN   | 0.747          | 0.097                                               |                                          | N/A                 | N/A                                                   |                                    | 0.693#                | <b>0.017</b>                                   |                                             | N/A                                               | 0.522                                              |                                                        |
| 3    | ON   | 0.975          | 0.069                                               | 0.243                                    | N/A                 | N/A                                                   | N/A                                | 0.988                 | 0.041                                          | 0.125                                       | N/A                                               | 0.999                                              | 0.567                                                  |
|      | AN   | 0.880          | 0.648                                               |                                          | N/A                 | N/A                                                   |                                    | 0.867                 | 0.811                                          |                                             | N/A                                               | 0.999                                              |                                                        |
| 4    | ON   | 0.925          | 0.395                                               | 0.088                                    | <b>0.868*</b>       | 0.999                                                 | <b>&lt;0.001</b>                   | <b>0.747*</b>         | 0.056                                          | <b>0.001</b>                                | 0.147*                                            | <b>0.037</b>                                       | <b>0.005*</b>                                          |
|      | AN   | 0.773          | 0.208                                               |                                          | <b>0.653*#</b>      | <b>0.004</b>                                          |                                    | <b>0.427*#</b>        | <b>&lt;0.001</b>                               |                                             | <b>0.039*</b>                                     | <b>&lt;0.001</b>                                   |                                                        |
| 5    | ON   | <b>0.963*</b>  | 0.113                                               | <b>0.008*</b>                            | <b>0.934*</b>       | 0.999                                                 | <b>&lt;0.001</b>                   | 0.888                 | 0.938                                          | 0.053                                       | 0.505                                             | 0.114                                              | 0.555                                                  |
|      | AN   | <b>0.733*</b>  | 0.064                                               |                                          | <b>0.680*#</b>      | <b>0.010</b>                                          |                                    | 0.707#                | <b>0.026</b>                                   |                                             | 0.480                                             | 0.831                                              |                                                        |
| 6    | ON   | 0.888          | 0.938                                               | 0.558                                    | <b>0.945*</b>       | 0.999                                                 | <b>&lt;0.001</b>                   | <b>0.350*#</b>        | <b>&lt;0.001</b>                               | <b>&lt;0.001</b>                            | 0.263                                             | <b>&lt;0.001</b>                                   | <b>0.004*</b>                                          |
|      | AN   | 0.813          | 0.530                                               |                                          | <b>0.733*</b>       | 0.064                                                 |                                    | <b>0.533*#</b>        | <b>&lt;0.001</b>                               |                                             | 0.286                                             | <b>&lt;0.001</b>                                   |                                                        |
| 7    | ON   | 0.913          | 0.551                                               | 0.178                                    | <b>0.967*</b>       | 0.999                                                 | <b>&lt;0.001</b>                   | <b>0.875*</b>         | 0.886                                          | <b>0.003</b>                                | 0.192                                             | 0.606                                              | <b>0.040*</b>                                          |
|      | AN   | 0.787          | 0.293                                               |                                          | <b>0.827*</b>       | 0.680                                                 |                                    | <b>0.587*#</b>        | <b>0.0001</b>                                  |                                             | 0.580                                             | <b>0.009</b>                                       |                                                        |

*Table S2: Bonferroni corrections of correlations between test scores and linguistic values of items.*

| <b>Case</b> | <b>Test</b>  | <b>Linguistic value</b> | <b>Spearman correlation coefficient</b> | <b>p-value after Bonferroni correction</b> |
|-------------|--------------|-------------------------|-----------------------------------------|--------------------------------------------|
| 4           | Postop<br>AN | Transitivity            | -0.3915824                              | 0.004                                      |
| 6           | Postop<br>ON | Frequency               | 0.4142422                               | 0.001                                      |
|             | Postop<br>AN | Age of Acquisition      | -0.3101887                              | 0.047                                      |
|             | Postop<br>AN | Instrumentality         | -0.3392857                              | 0.020                                      |
